# Supplementary material for: Proton conductivity and phase transitions in 1,2,3-triazole
Source: Royal Society of Chemistry journal article supplement (doi:10.1039/c5cp07603j), 2016-01-01
Supplement: c5cp07603j1.pdf [file c5cp07603j1.pdf]

Electronic Supplementary Information (ESI) For

## Proton Conductivity and Phase Transitions in 1,2,3-Triazole

Martin Pulst<sup>a</sup>, Jens Balko<sup>b</sup>, Yury Golitsyn<sup>b</sup>, Detlef Reichert<sup>b</sup>, Karsten Busse<sup>a</sup> and Jörg Kressler<sup>\*,a</sup>

<sup>a</sup> Department of Chemistry, Martin Luther University Halle-Wittenberg, D-06099 Halle, Germany

E-mail: joerg.kressler@chemie.uni-halle.de

<sup>b</sup> Department of Physics, Martin Luther University Halle-Wittenberg, D-06099 Halle, Germany

## X-ray data

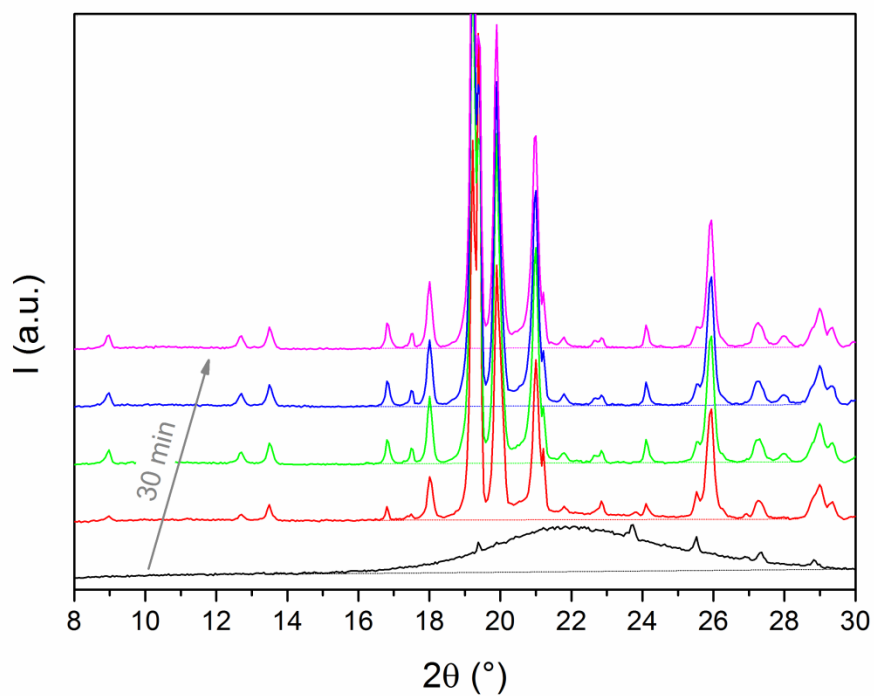

**Figure S1** Evolution of the WAXS diffractogram of TR at  $T = -40\text{ }^{\circ}\text{C}$ , observing complete crystallization of the sample after 30 min. The baselines should guide the eye.

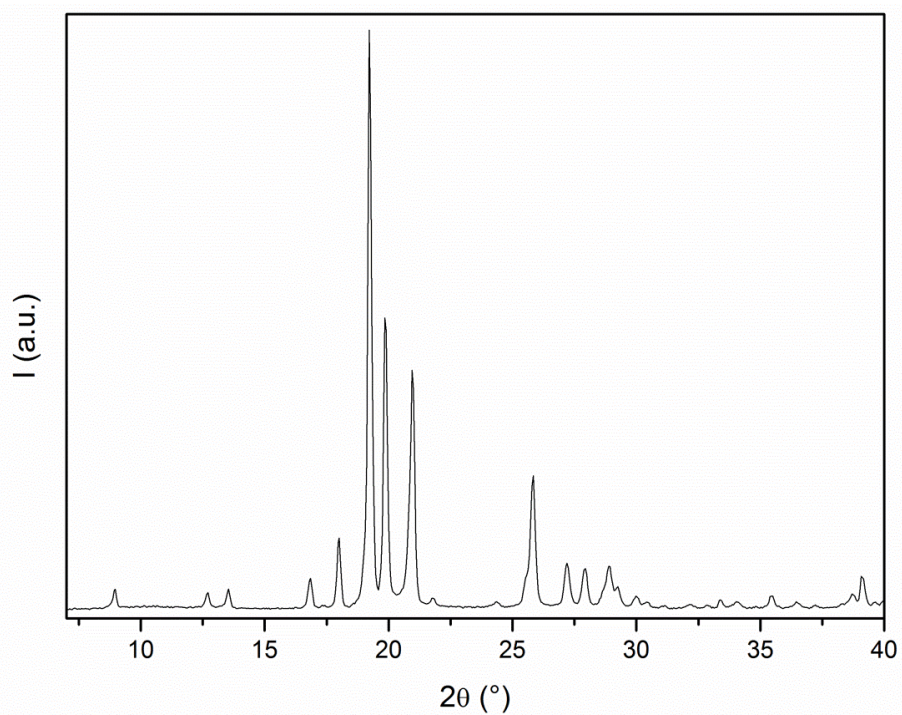

**Figure S2** WAXS diffractogram of 1,2,3-triazole at  $T = -15\text{ }^{\circ}\text{C}$  in the range of  $7^{\circ} < 2\theta < 40^{\circ}$ .

**Table S1** Evaluation of the WAXS diffractogram and assignment of the reflexes of 1,2,3-triazole at  $T = -15$  °C.

| $2\theta$<br>(°) | $I$<br>(counts) | $I_{rel}$<br>(%) | $d$<br>(Å) | $d^{-2}$<br>(Å <sup>-2</sup> ) | <i>Index</i><br>$h$ $k$ $l$ | $d_{cal}$<br>(Å) | $d_{cal}^{-2}$<br>(Å <sup>-2</sup> ) | $d-d_{cal}$<br>(Å) | $d^{-2} - d_{cal}^{-2}$<br>(Å <sup>-2</sup> ) |
|------------------|-----------------|------------------|------------|--------------------------------|-----------------------------|------------------|--------------------------------------|--------------------|-----------------------------------------------|
| 8.95             | 1664            | 3.4              | 9.883      | 0.010                          | 2 0 0                       | 9.843            | 0.010                                | 0.040              | 0.000                                         |
| 12.69            | 1289            | 2.6              | 6.976      | 0.021                          | $\bar{2}$ 0 1               | 6.973            | 0.021                                | 0.003              | 0.000                                         |
| 13.53            | 1595            | 3.2              | 6.544      | 0.023                          | 2 0 1                       | 6.541            | 0.023                                | 0.003              | 0.000                                         |
| 16.83            | 2679            | 5.4              | 5.267      | 0.036                          | 1 1 0                       | 5.257            | 0.036                                | 0.010              | 0.000                                         |
| 17.99            | 6249            | 12.7             | 4.930      | 0.041                          | 4 0 0                       | 4.921            | 0.041                                | 0.009              | 0.000                                         |
| 19.24            | 49249           | 100.0            | 4.614      | 0.047                          | $\bar{1}$ 1 1               | 4.634            | 0.047                                | -0.020             | 0.000                                         |
| 19.87            | 26177           | 53.2             | 4.467      | 0.050                          | $\bar{4}$ 0 1               | 4.467            | 0.050                                | 0.000              | 0.000                                         |
| 20.95            | 20036           | 40.7             | 4.240      | 0.056                          | 4 0 1                       | 4.237            | 0.056                                | 0.003              | 0.000                                         |
| 21.78            | 643             | 1.3              | 4.080      | 0.060                          | 2 0 2                       | 4.189            | 0.057                                | -0.109             | 0.003                                         |
| 24.35            | 407             | 0.8              | 3.655      | 0.075                          | 4 1 0                       | 3.654            | 0.075                                | 0.001              | 0.000                                         |
| 25.55            | 2397            | 4.9              | 3.486      | 0.082                          | $\bar{4}$ 0 2               | 3.506            | 0.081                                | -0.020             | 0.001                                         |
| 25.82            | 11570           | 23.5             | 3.450      | 0.084                          | 1 1 2                       | 3.456            | 0.084                                | -0.006             | 0.000                                         |
| 27.20            | 3706            | 7.5              | 3.279      | 0.093                          | 2 1 2                       | 3.273            | 0.093                                | 0.006              | 0.000                                         |
| 27.92            | 3299            | 6.7              | 3.196      | 0.098                          | 5 1 0                       | 3.175            | 0.099                                | 0.021              | -0.001                                        |
| 28.89            | 3202            | 6.5              | 3.091      | 0.105                          | $\bar{5}$ 0 2               | 3.068            | 0.106                                | 0.023              | -0.002                                        |
| 29.26            | 1352            | 2.7              | 3.052      | 0.107                          | 3 1 2                       | 3.048            | 0.108                                | 0.004              | 0.000                                         |
| 29.99            | 975             | 2.0              | 2.980      | 0.113                          | 5 1 1                       | 2.971            | 0.113                                | 0.009              | -0.001                                        |
| 32.87            | 226             | 0.5              | 2.725      | 0.135                          | 3 0 3                       | 2.727            | 0.134                                | -0.002             | 0.000                                         |
| 33.40            | 713             | 1.4              | 2.683      | 0.139                          | $\bar{1}$ 1 3               | 2.688            | 0.138                                | -0.005             | 0.001                                         |
| 35.46            | 1046            | 2.1              | 2.532      | 0.156                          | $\bar{3}$ 1 3               | 2.537            | 0.155                                | -0.005             | 0.001                                         |

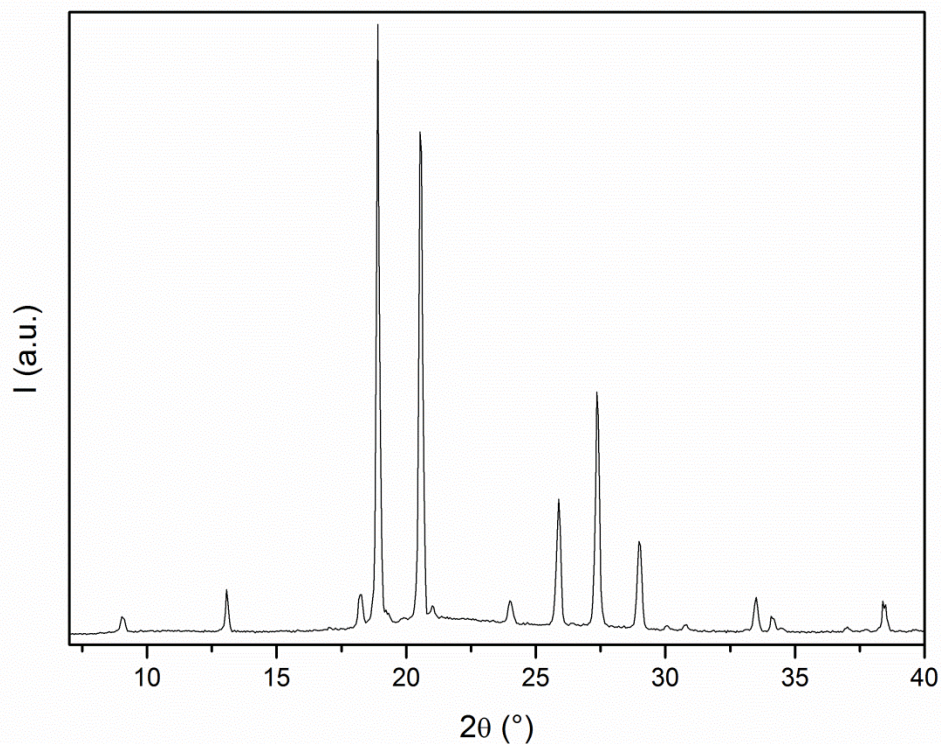

**Figure S3** WAXS diffractogram of 1,2,3-triazole at  $T = 10\text{ }^{\circ}\text{C}$  in the range of  $7^{\circ} < 2\theta < 40^{\circ}$ .

**Table S2** Evaluation of the WAXS diffractogram and assignment of the reflexes of 1,2,3-triazole at  $T = 10\text{ }^{\circ}\text{C}$ .

| $2\theta$<br>( $^{\circ}$ ) | $I$<br>(counts) | $I_{rel}$<br>(%) | $d$<br>( $\text{\AA}$ ) | $d^{-2}$<br>( $\text{\AA}^{-2}$ ) | <i>Index</i><br>$h\ k\ l$ | $d_{cal}$<br>( $\text{\AA}$ ) | $d_{cal}^{-2}$<br>( $\text{\AA}^{-2}$ ) | $d - d_{cal}$<br>( $\text{\AA}$ ) | $d^{-2} - d_{cal}^{-2}$<br>( $\text{\AA}^{-2}$ ) |
|-----------------------------|-----------------|------------------|-------------------------|-----------------------------------|---------------------------|-------------------------------|-----------------------------------------|-----------------------------------|--------------------------------------------------|
| 9.07                        | 1287            | 2.8              | 9.755                   | 0.011                             | 0 2 0                     | 9.686                         | 0.011                                   | 0.069                             | 0.000                                            |
| 13.08                       | 3306            | 7.2              | 6.767                   | 0.022                             | 1 2 0                     | 6.720                         | 0.022                                   | 0.047                             | 0.000                                            |
| 18.24                       | 1967            | 4.3              | 4.864                   | 0.042                             | 0 4 0                     | 4.843                         | 0.043                                   | 0.021                             | 0.000                                            |
| 18.91                       | 45813           | 100.0            | 4.693                   | 0.045                             | 2 0 0                     | 4.665                         | 0.046                                   | 0.027                             | -0.001                                           |
| 20.56                       | 40955           | 89.4             | 4.320                   | 0.054                             | 1 4 0                     | 4.298                         | 0.054                                   | 0.021                             | -0.001                                           |
| 21.02                       | 761             | 1.7              | 4.226                   | 0.056                             | 2 2 0                     | 4.203                         | 0.057                                   | 0.023                             | -0.001                                           |
| 24.02                       | 1879            | 4.1              | 3.705                   | 0.073                             | 0 1 1                     | 3.633                         | 0.076                                   | 0.072                             | -0.003                                           |
| 25.88                       | 10083           | 22.0             | 3.443                   | 0.084                             | 1 1 1                     | 3.385                         | 0.087                                   | 0.057                             | -0.003                                           |
| 27.38                       | 19012           | 41.5             | 3.258                   | 0.094                             | 0 3 1                     | 3.209                         | 0.097                                   | 0.049                             | -0.003                                           |
| 29.00                       | 7354            | 16.1             | 3.079                   | 0.105                             | 1 3 1                     | 3.035                         | 0.109                                   | 0.044                             | -0.003                                           |
| 30.06                       | 350             | 0.8              | 2.972                   | 0.113                             | 3 2 0                     | 2.961                         | 0.114                                   | 0.011                             | -0.001                                           |
| 30.78                       | 474             | 1.0              | 2.905                   | 0.118                             | 2 1 1                     | 2.866                         | 0.122                                   | 0.039                             | -0.003                                           |
| 33.49                       | 2651            | 5.8              | 2.675                   | 0.140                             | 2 3 1                     | 2.644                         | 0.143                                   | 0.031                             | -0.003                                           |
| 34.13                       | 1263            | 2.8              | 2.627                   | 0.145                             | 3 4 0                     | 2.617                         | 0.146                                   | 0.010                             | -0.001                                           |

|       |      |     |       |       |       |       |       |       |        |
|-------|------|-----|-------|-------|-------|-------|-------|-------|--------|
| 34.47 | 291  | 0.6 | 2.602 | 0.148 | 1 5 1 | 2.572 | 0.151 | 0.030 | -0.003 |
| 37.02 | 344  | 0.8 | 2.428 | 0.170 | 0 8 0 | 2.422 | 0.171 | 0.007 | -0.001 |
| 37.73 | 163  | 0.4 | 2.384 | 0.176 | 3 1 1 | 2.363 | 0.179 | 0.021 | -0.003 |
| 38.37 | 4314 | 9.4 | 2.346 | 0.182 | 1 8 0 | 2.344 | 0.182 | 0.002 | -0.000 |
| 38.46 | 2020 | 4.4 | 2.340 | 0.183 | 4 0 0 | 2.333 | 0.184 | 0.008 | -0.001 |
| 39.63 | 144  | 0.3 | 2.274 | 0.193 | 4 2 0 | 2.268 | 0.194 | 0.006 | -0.001 |

**Table S3** Refined atom positions and bond lengths of the low temperature modification of TR at  $T = -15$  °C. For assignment of the atoms see the molecular complex in Figure S4 (c).

| <i>Atom</i> | <i>Position</i> |          |          | <i>Bond</i> | <i>Lengths (Å)</i> |
|-------------|-----------------|----------|----------|-------------|--------------------|
|             | <i>x</i>        | <i>y</i> | <i>z</i> |             |                    |
| N1          | 0.4054          | 0.0075   | 0.9324   | N1 - N9     | 1.32               |
| C2          | 0.4431          | 0.2042   | 0.9060   | N1 - C2     | 1.34               |
| N3          | 0.4038          | 0.0435   | 0.7050   | C2 - C4     | 1.36               |
| C4          | 0.4421          | 0.2273   | 0.7601   | C2 - H17    | 1.14               |
| N5          | 0.2230          | 0.8419   | 1.0919   | N3 - N9     | 1.32               |
| C6          | 0.2611          | 0.6606   | 1.1494   | N3 - C4     | 1.34               |
| N7          | 0.2276          | 0.8766   | 1.3329   | N3 - H18    | 1.11               |
| C8          | 0.2639          | 0.6819   | 1.2977   | C4 - H19    | 1.14               |
| N9          | 0.3810          | -0.0914  | 0.8098   | N5 - N10    | 1.32               |
| N10         | 0.2043          | 0.9627   | 1.2063   | N5 - C6     | 1.33               |
| N11         | 0.5707          | 1.1006   | -0.2161  | C6 - C8     | 1.38               |
| C12         | 0.6064          | 0.9202   | -0.2728  | C6 - H20    | 1.14               |
| N13         | 0.5616          | 1.1498   | -0.4428  | N7 - N10    | 1.32               |
| C14         | 0.6006          | 0.9518   | -0.4182  | N7 - C8     | 1.33               |
| N15         | 0.5430          | 1.2415   | -0.3196  | C8 - H21    | 1.14               |
| H16         | 0.1709          | 3.1227   | 1.1923   | N10 - H16   | 1.10               |
| H17         | 0.4682          | 0.3133   | 0.9995   | N11 - N15   | 1.32               |
| H18         | 0.3902          | -0.0042  | 0.5906   | N11 - C12   | 1.34               |
| H19         | 0.4661          | 0.3631   | 0.6851   | N11 - H22   | 1.11               |
| H20         | 0.2848          | 0.5212   | 1.0763   | C12 - C14   | 1.36               |
| H21         | 0.2908          | 0.5657   | 1.3860   | C12 - H23   | 1.14               |
| H22         | 0.5623          | 1.1416   | -0.1014  | N13 - N15   | 1.32               |
| H23         | 0.6339          | 0.7802   | -0.1991  | N13 - C14   | 1.34               |
| H24         | 0.6213          | 0.8482   | -0.5126  | C14 - H24   | 1.14               |
|             |                 |          |          | H16 - N10   | 1.10               |

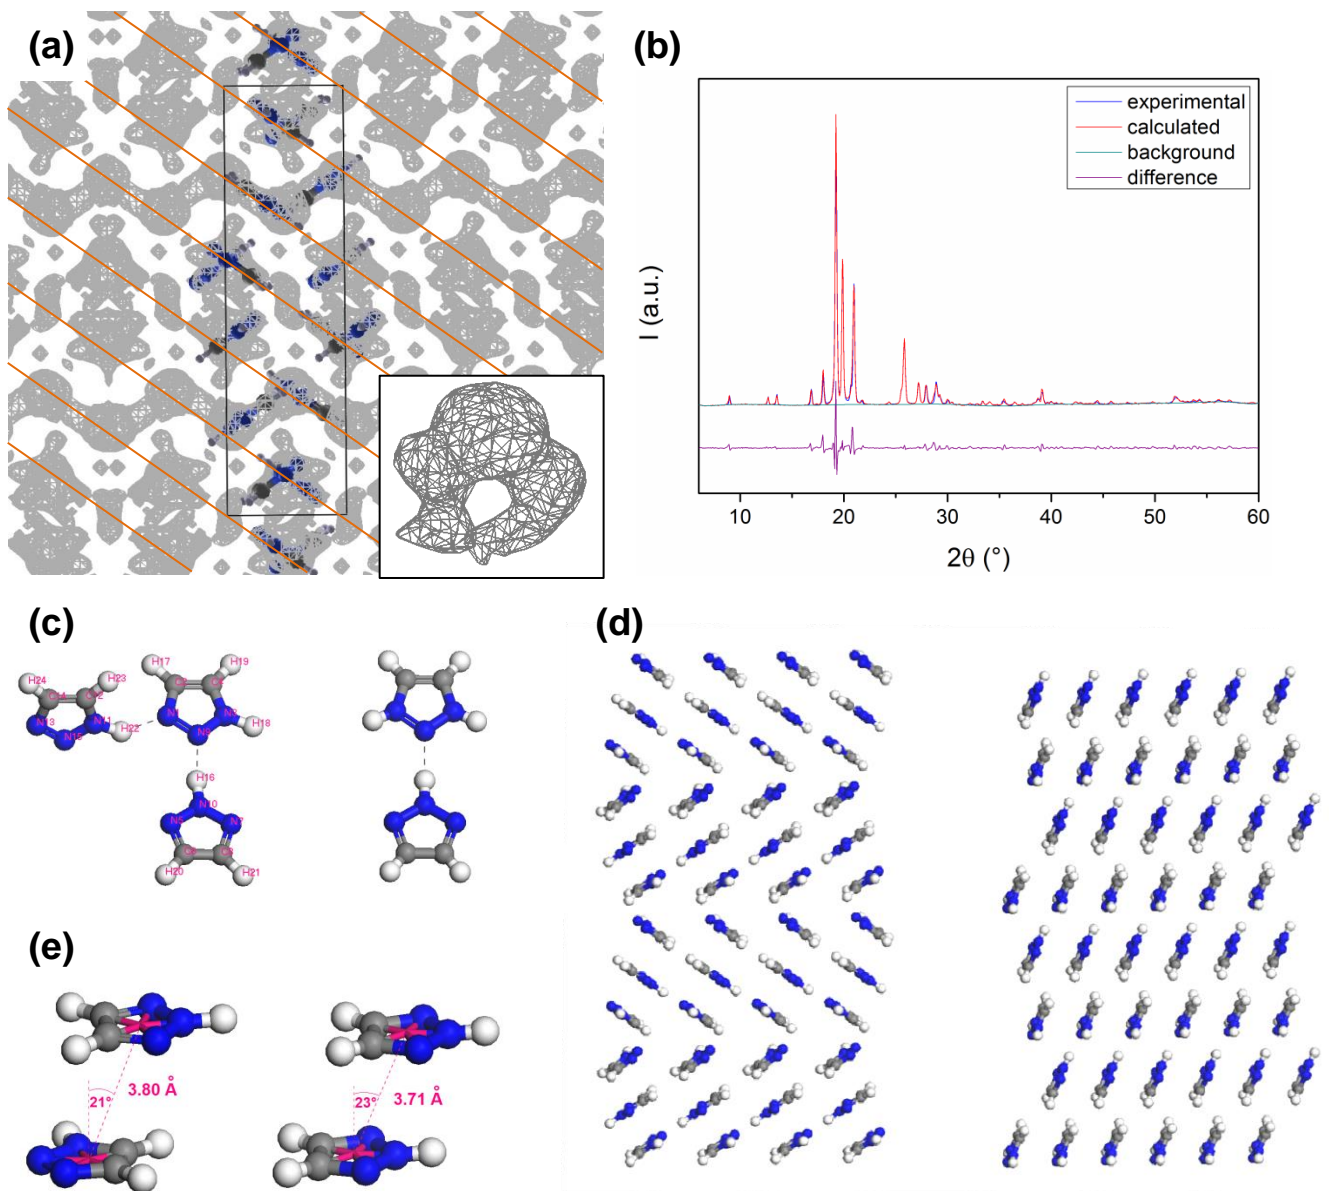

**Figure S4** (a) Unrefined Fourier map of the electron density in the monoclinic unit cell of TR at  $T = -15\text{ }^{\circ}\text{C}$ , the positions of the TR molecules as used for the refinement of the data is deposited. The orange lines are the (510) planes and the inset shows the electron density contour of a pentagon. (b) Experimental WAXS trace of the low temperature modification of TR at  $T = -15\text{ }^{\circ}\text{C}$  and the simulated trace after Rietveld refinement ( $R_p = 9.39\%$ ,  $R_{wp} = 14.28\%$ ) using BIOVIA Materials Studio Reflex software. The difference of the experimental and simulated diffractograms is additionally shown. (c) Comparison of the 2:1 molecular complex (1H:2H) of the monoclinic (left) and 1:1 molecular complex of the orthorhombic modification. The atoms are labeled for the assignment of the positions and bond lengths in Table S3. (d) Comparison of the  $\pi$ - $\pi$  stacks of the low temperature modification (left) and the high temperature modification (right). (e) Centroid-centroid distance between two TR molecules in the monoclinic (left) and orthorhombic modification (right).



## Determination of Conductivity and Relaxation Time from Impedance Data

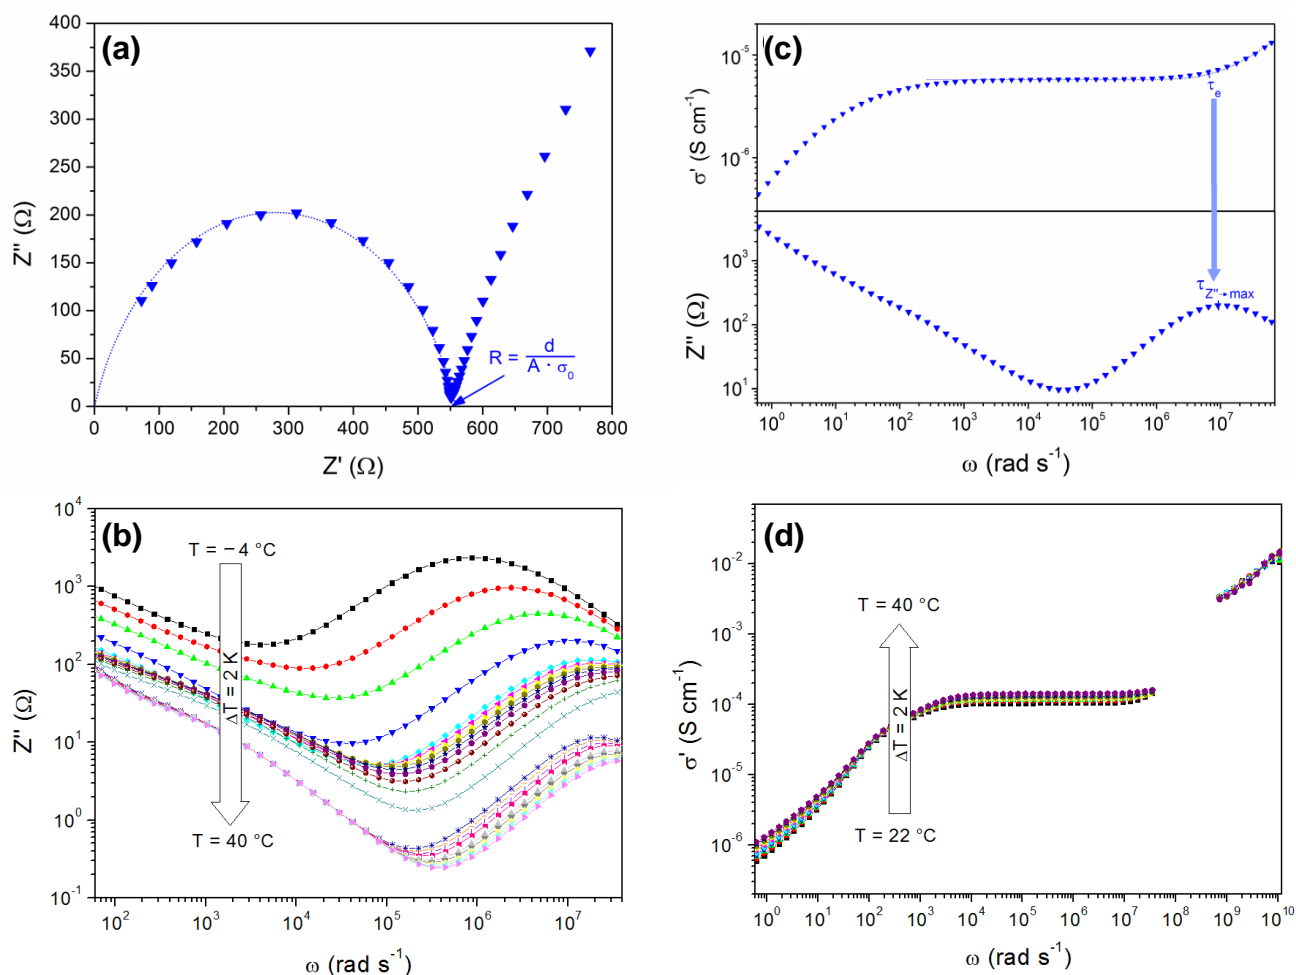

**Figure S5** (a) Nyquist plot of 1,2,3-triazole at  $T = 2\text{ }^\circ\text{C}$  (blue curve of Fig. 4 (a)). The arrow shows the bulk resistance  $R$  which can be used for the calculation of the dc conductivity. (b) Imaginary part of the complex impedance as function of the angular frequency between  $T = -4\text{ }^\circ\text{C}$  and  $T = 40\text{ }^\circ\text{C}$  in steps of  $\Delta T = 2\text{ K}$ . (c) Agreement of the characteristic relaxation time ( $\tau_e$ ), obtained by fitting the conductivity data with the Dyre function (eq. 2) with the relaxation time of the maximum in the imaginary part of the complex impedance as function of the angular frequency ( $\tau_{Z'' \rightarrow \text{max}}$ ) at  $T = 2\text{ }^\circ\text{C}$ . (d) Same as Fig. 4 (a) for temperatures between  $T = 22\text{ }^\circ\text{C}$  and  $T = 40\text{ }^\circ\text{C}$  in steps of  $\Delta T = 2\text{ K}$ . The high frequency data ( $5 \cdot 10^7\text{ Hz} \leq \nu \leq 1.8 \cdot 10^9\text{ Hz}$ ) measured with the HP impedance analyzer in a Novocontrol RF sample cell (diameter: 3 mm; sample thickness: 1 mm) are added. Due to inductive effects, it is not possible to obtain correct data below  $\nu \geq 5 \cdot 10^7\text{ Hz}$  with this sample cell ('frequency gap'). Small deviations of  $\sigma'$  are possible due to the different sample cell geometries. The high frequency region shows a steady increase and no further relaxation above  $\omega > \omega_e$ .

## Pulsed field gradient nuclear magnetic resonance (PFG NMR)

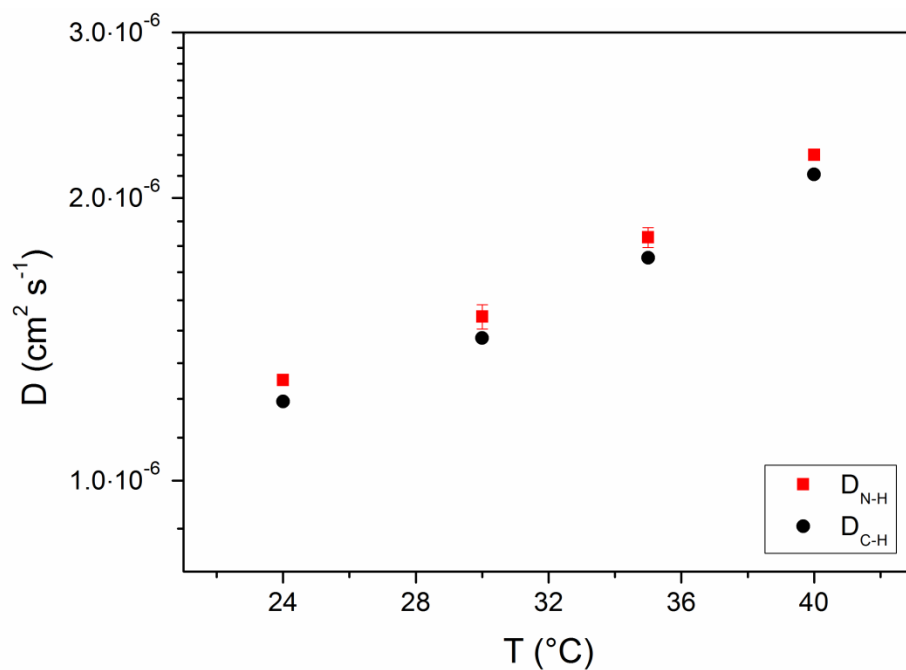

**Figure S6** Diffusion coefficients, measured with PFG NMR spectroscopy. The diffusion coefficients of the acidic N-H and aromatic C-H proton are received by separate integration of the corresponding signals.

## Barton–Nakajima–Namikawa relation and relaxation time

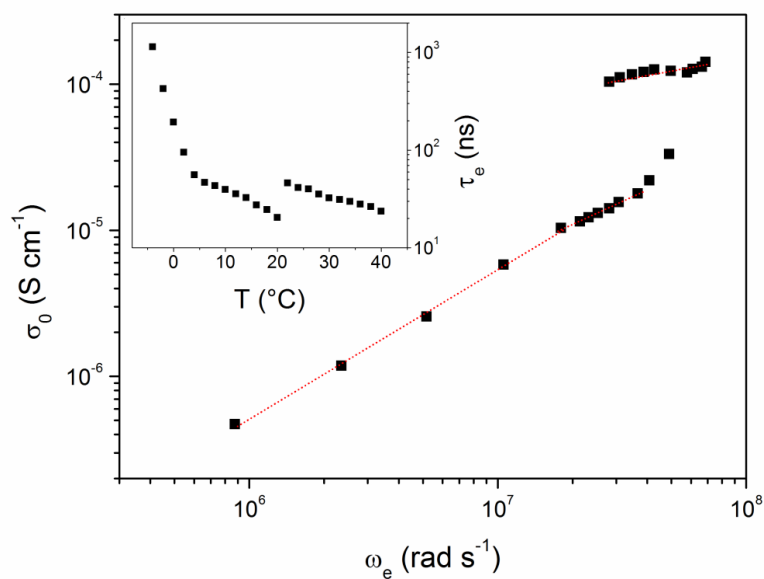

**Figure S7** Proton conductivity of 1,2,3-triazole as function of the characteristic angular frequency of the Dyre formula. The inset shows the temperature dependence of the relaxation time ( $\tau_e = 1 / \omega_e$ ).



## Explanation of the separation of the proton conductivity (Figure 7)

The proton conductivity is given by eq. 10:

$$\sigma_0 = \frac{F^2 \cdot c_0}{R \cdot T} (D_{\text{hopp}} \cdot H_R^{-1} + 2 \cdot D_{\text{vehicle}} \cdot \alpha_{\text{vehicle}}) \quad (10)$$

Proton hopping is known as random process but only the transport of charges can contribute to the proton conductivity. The physical quantity which describes the proportion of actively contribution hopping charge carriers is the inverse Haven ratio  $H_R^{-1}$ . However, the number of charges for proton hopping is also limited to a degree of dissociation  $\alpha_{\text{hopp}}$ . Replacing  $H_R^{-1}$  by  $\alpha_{\text{hopp}}$  yields

$$\frac{R \cdot T \cdot \sigma_0}{F^2 \cdot c_0} = D_{\text{hopp}} \cdot \alpha_{\text{hopp}} + 2 \cdot D_{\text{vehicle}} \cdot \alpha_{\text{vehicle}} \quad (S1)$$

In the limit of  $T \rightarrow 30^\circ\text{C}$ ,  $D_{\text{vehicle}}$  can be approximated by

$$D_{\text{vehicle}} = D_{\text{vehicle}} \Big|_{T=30^\circ\text{C}} + \frac{\partial D_{\text{vehicle}}}{\partial D_{\text{hopp}}} \Big|_{T=30^\circ\text{C}} \cdot (D_{\text{hopp}} - D_{\text{hopp}} \Big|_{T=30^\circ\text{C}}) \quad (S2)$$

And then eq. S1 turns into

$$\frac{R \cdot T \cdot \sigma_0}{F^2 \cdot c_0} = \left( \alpha_{\text{hopp}} + \frac{\partial (2 \alpha_{\text{vehicle}} D_{\text{vehicle}})}{\partial D_{\text{hopp}}} \Big|_{T=30^\circ\text{C}} \right) \cdot D_{\text{hopp}} + 2 \left( \alpha_{\text{vehicle}} D_{\text{vehicle}} - \frac{\partial (\alpha_{\text{vehicle}} D_{\text{vehicle}})}{\partial D_{\text{hopp}}} D_{\text{hopp}} \right) \Big|_{T=30^\circ\text{C}} \quad (S3)$$

Since the temperature dependence of  $D_{\text{vehicle}}$  is much smaller compared to  $D_{\text{hopp}}$  (see discussion around eq. 5 and eq. 11), the partial derivative is negligible small and eq. S3 simplifies to

$$\frac{R \cdot T \cdot \sigma_0}{F^2 \cdot c_0} = \alpha_{\text{hopp}} \cdot D_{\text{hopp}} + 2 \cdot (\alpha_{\text{vehicle}} D_{\text{vehicle}}) \Big|_{T=30^\circ\text{C}} \quad (S4)$$

Using again inverse Haven ratio  $H_R^{-1}$  then eq. S4 turns into eq. 12

$$\frac{R \cdot T \cdot \sigma_0}{F^2 \cdot c_0} = D_{\text{hopp}} \cdot H_R^{-1} + 2 \cdot (\alpha_{\text{vehicle}} D_{\text{vehicle}}) \Big|_{T=30^\circ\text{C}} \quad (12)$$

This mathematical derivation can also be confirmed by experimental values which are shown in Fig. S8. The intrinsic conductivity and its contributions to the two mechanisms are plotted considering the temperature dependence of  $D_{\text{hopp}}$  and  $D_{\text{vehicle}}$  (assuming Arrhenius behavior, Fig. 6 and Fig. S6). The calculated error for the inverse Haven ratio from the consideration of the temperature dependence of  $D_{\text{vehicle}}$  is in the same range as the error of the linearization ( $H_R^{-1} = (1.1 \pm 0.1) \cdot 10^{-2}$ ). Thus, the averaged degree of dissociation at  $T = 30^\circ\text{C}$  is  $\alpha_{\text{vehicle}} = (3.5 \pm 0.4) \cdot 10^{-4}$ .

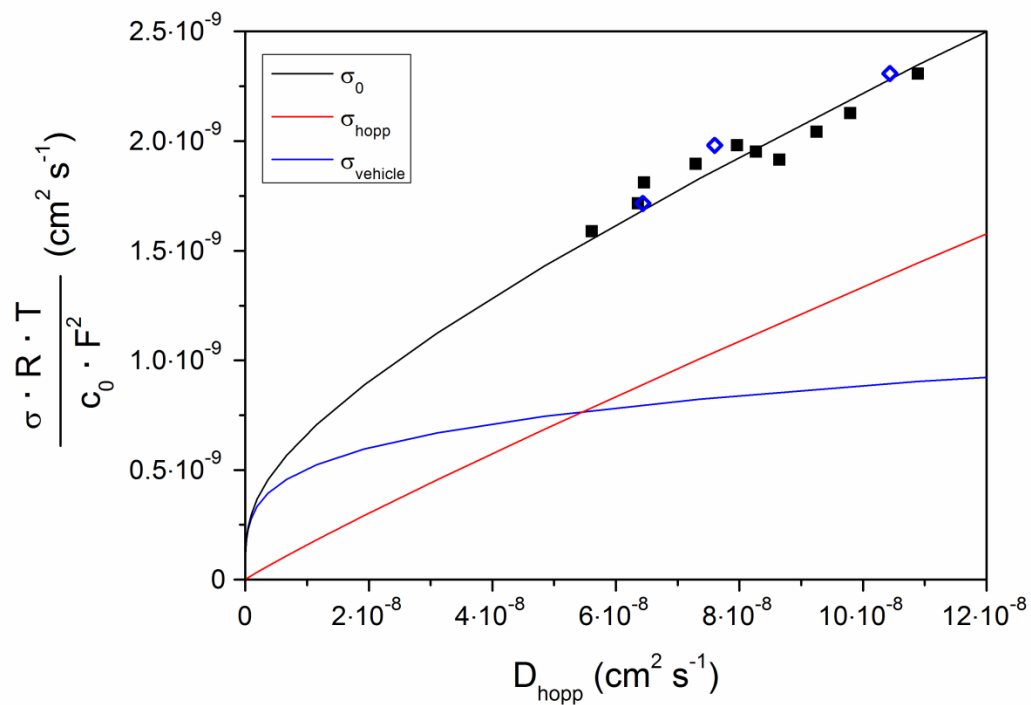

**Figure S8** Intrinsic conductivity and the contributions to the two mechanisms as function of the hopping diffusion coefficient.

### Dielectric constant

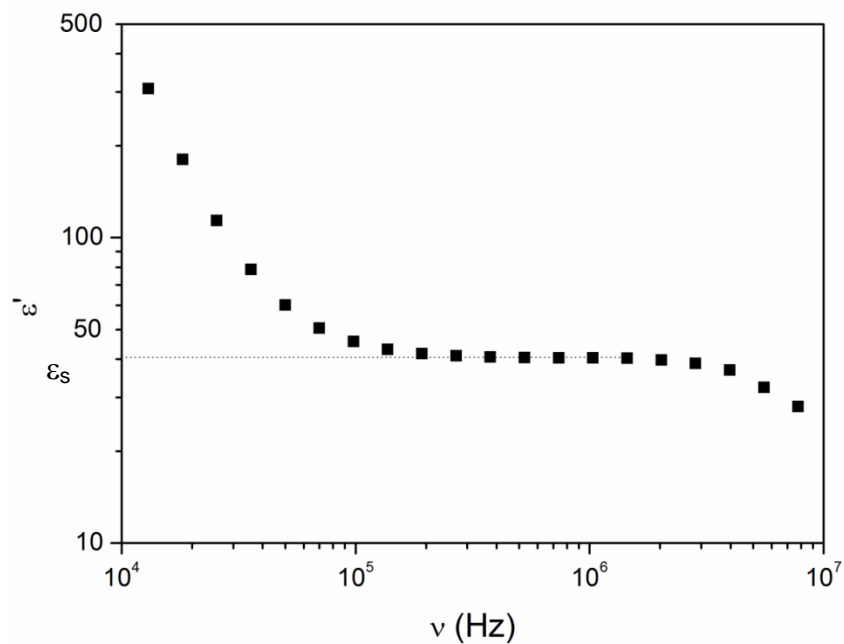

**Figure S9** Real part of the complex dielectric function as function of the frequency at  $T = 24 \text{ }^\circ\text{C}$  for determination of the dielectric constant  $\epsilon_s$ .
